# Supplementary material
Source: PubMed Central journal article supplement (PMC3408553)
Supplement: NIHMS369753-supplement-01.pdf [file NIHMS369753-supplement-01.pdf]

## Supplementary Tables

Supplementary Table 1. SNP annotation, Odds Ratios (OR) and P-values corresponding to main effect of 178 common variants in genes that regulate circadian rhythm on breast cancer susceptibility (incident and prevalent cases), adjusted for matching factors ( $n_{\text{cases}}=609$ ,  $n_{\text{controls}}=1216$ ). ORs and p-values are also presented for an analysis of the main effect of each SNP within strata of exposure to rotating shift-work (<24 vs.  $\geq 24$  cumulative months of rotating shift-work). P-values are reported for both the independent effect of the interaction term and the joint effect of genotype and the interaction term. Analyses stratified by or adjusted for shift-work exposure were restricted to incident cases and their matched controls ( $n_{\text{cases}}=438$ ,  $n_{\text{controls}}=880$ ). Multiple-testing-adjusted p-values (P-perm) were obtained using the max(T) permutation procedure in PLINK (10,000 permutations) within covariate defined clusters.

| SNP      | Allele | MAF   | Gene | Location | Main Effect Analysis |         |        | <24mo Shift-work     |         |        | $\geq 24$ mo Shift-work |         |        | Joint Test<br>P-value | Interac-<br>tion<br>Term<br>P-value |
|----------|--------|-------|------|----------|----------------------|---------|--------|----------------------|---------|--------|-------------------------|---------|--------|-----------------------|-------------------------------------|
|          |        |       |      |          | OR (CI)              | P-value | P-perm | OR (CI)              | P-value | P-perm | OR (CI)                 | P-value | P-perm |                       |                                     |
| rs707455 | G > A  | 0.422 | PER3 | upstream | 1.08<br>(0.94, 1.25) | 0.2672  | 1.0000 | 1.13<br>(0.91, 1.41) | 0.2730  | 1.0000 | 1.06<br>(0.82, 1.36)    | 0.6751  | 1.0000 | 0.5106                | 0.6102                              |
| rs697672 | A > G  | 0.14  | PER3 | upstream | 0.90<br>(0.74, 1.10) | 0.3191  | 1.0000 | 0.85<br>(0.62, 1.17) | 0.3193  | 1.0000 | 0.99<br>(0.69, 1.42)    | 0.9632  | 1.0000 | 0.5744                | 0.5069                              |

| SNP        | Allele | MAF  | Gene  | Location          | Main Effect Analysis |         |        | <24mo Shift-work     |         |        | ≥24mo Shift-work     |         |        | Joint Test<br>P-value | Interac-<br>tion Term<br>P-value |
|------------|--------|------|-------|-------------------|----------------------|---------|--------|----------------------|---------|--------|----------------------|---------|--------|-----------------------|----------------------------------|
|            |        |      |       |                   | OR (CI)              | P-value | P-perm | OR (CI)              | P-value | P-perm | OR (CI)              | P-value | P-perm |                       |                                  |
| rs1044245  | G > A  | 0.15 | PER3  | upstream          | 1.02<br>(0.84, 1.25) | 0.8221  | 1.0000 | 1.11<br>(0.82, 1.51) | 0.4867  | 1.0000 | 1.04<br>(0.72, 1.50) | 0.8551  | 1.0000 | 0.7626                | 0.6888                           |
| rs697673   | G > A  | 0.22 | PER3  | upstream          | 0.94<br>(0.79, 1.11) | 0.4767  | 1.0000 | 0.81<br>(0.62, 1.05) | 0.1141  | 1.0000 | 1.01<br>(0.74, 1.37) | 0.9631  | 1.0000 | 0.2829                | 0.2955                           |
| rs228729   | G > A  | 0.34 | PER3  | intron            | 1.02<br>(0.87, 1.18) | 0.8389  | 1.0000 | 1.00<br>(0.79, 1.27) | 0.9818  | 1.0000 | 0.97<br>(0.74, 1.27) | 0.7991  | 1.0000 | 0.9992                | 0.7577                           |
| rs228644   | G > A  | 0.40 | PER3  | intron            | 1.01<br>(0.88, 1.17) | 0.8477  | 1.0000 | 0.86<br>(0.69, 1.08) | 0.1866  | 1.0000 | 1.17<br>(0.91, 1.52) | 0.2188  | 1.0000 | 0.4471                | 0.0844                           |
| rs11121029 | G > A  | 0.23 | PER3  | intron            | 1.07<br>(0.90, 1.26) | 0.4407  | 1.0000 | 1.09<br>(0.85, 1.41) | 0.4977  | 1.0000 | 1.12<br>(0.82, 1.53) | 0.4612  | 1.0000 | 0.7811                | 0.9265                           |
| rs17374292 | G > A  | 0.14 | PER3  | intron            | 1.13<br>(0.94, 1.37) | 0.1983  | 1.0000 | 1.16<br>(0.86, 1.58) | 0.3364  | 1.0000 | 1.30<br>(0.93, 1.81) | 0.1278  | 1.0000 | 0.6435                | 0.5991                           |
| rs697690   | A > G  | 0.32 | PER3  | intron            | 1.07<br>(0.92, 1.24) | 0.4131  | 1.0000 | 1.17<br>(0.92, 1.47) | 0.1980  | 1.0000 | 1.05<br>(0.80, 1.37) | 0.7195  | 1.0000 | 0.4322                | 0.5591                           |
| rs2640909  | A > G  | 0.31 | PER3  | coding            | 0.88<br>(0.75, 1.02) | 0.0974  | 1.0000 | 0.83<br>(0.65, 1.05) | 0.1197  | 1.0000 | 0.92<br>(0.69, 1.23) | 0.5696  | 1.0000 | 0.2850                | 0.5010                           |
| rs1773138  | G > A  | 0.18 | PER3  | intron            | 1.00<br>(0.83, 1.20) | 0.9843  | 1.0000 | 1.16<br>(0.88, 1.53) | 0.2945  | 1.0000 | 0.83<br>(0.60, 1.16) | 0.2756  | 0.9998 | 0.5698                | 0.1221                           |
| rs228651   | G > A  | 0.37 | PER3  | downstream        | 1.03<br>(0.89, 1.19) | 0.7084  | 1.0000 | 0.93<br>(0.75, 1.17) | 0.5370  | 1.0000 | 1.29<br>(1.00, 1.66) | 0.0545  | 1.0000 | 0.8403                | 0.0697                           |
| rs228648   | A > G  | 0.45 | PER3  | downstream        | 0.99<br>(0.86, 1.14) | 0.9000  | 1.0000 | 1.15<br>(0.93, 1.42) | 0.2118  | 1.0000 | 0.85<br>(0.66, 1.10) | 0.2105  | 1.0000 | 0.4779                | 0.0927                           |
| rs11686712 | G > A  | 0.43 | NPAS2 | flanking_SUT<br>R | 1.00<br>(0.87, 1.16) | 0.9542  | 1.0000 | 0.97<br>(0.78, 1.21) | 0.8046  | 1.0000 | 0.93<br>(0.71, 1.22) | 0.5946  | 1.0000 | 0.9524                | 0.8357                           |
| rs3888170  | A > G  | 0.20 | NPAS2 | intron            | 1.15<br>(0.96, 1.36) | 0.1209  | 1.0000 | 1.14<br>(0.87, 1.49) | 0.3355  | 1.0000 | 1.23<br>(0.90, 1.67) | 0.1914  | 1.0000 | 0.6144                | 0.7849                           |
| rs3849381  | A > G  | 0.31 | NPAS2 | intron            | 1.05<br>(0.90, 1.22) | 0.5461  | 1.0000 | 0.91<br>(0.72, 1.15) | 0.4146  | 1.0000 | 1.08<br>(0.81, 1.44) | 0.6050  | 1.0000 | 0.6980                | 0.3631                           |
| rs10165970 | G > A  | 0.16 | NPAS2 | intron            | 1.05<br>(0.86, 1.27) | 0.6561  | 1.0000 | 1.24<br>(0.93, 1.66) | 0.1505  | 1.0000 | 0.77<br>(0.53, 1.12) | 0.1685  | 0.9998 | 0.3417                | 0.0460                           |

| SNP        | Allele | MAF  | Gene  | Location | Main Effect Analysis |         |        | <24mo Shift-work     |         |        | ≥24mo Shift-work     |         |        | Joint Test<br>P-value | Interac-<br>tion Term<br>P-value |
|------------|--------|------|-------|----------|----------------------|---------|--------|----------------------|---------|--------|----------------------|---------|--------|-----------------------|----------------------------------|
|            |        |      |       |          | OR (CI)              | P-value | P-perm | OR (CI)              | P-value | P-perm | OR (CI)              | P-value | P-perm |                       |                                  |
| rs11691732 | G > C  | 0.26 | NPAS2 | intron   | 1.00<br>(0.85, 1.18) | 0.9986  | 1.0000 | 1.17<br>(0.92, 1.50) | 0.2001  | 1.0000 | 0.86<br>(0.64, 1.17) | 0.3521  | 1.0000 | 0.4491                | 0.1273                           |
| rs10206927 | G > C  | 0.26 | NPAS2 | intron   | 1.00<br>(0.85, 1.17) | 0.9606  | 1.0000 | 1.16<br>(0.91, 1.48) | 0.2368  | 1.0000 | 0.87<br>(0.64, 1.18) | 0.3808  | 1.0000 | 0.4998                | 0.1529                           |
| rs965519   | A > G  | 0.17 | NPAS2 | intron   | 0.97<br>(0.80, 1.17) | 0.7121  | 1.0000 | 1.02<br>(0.77, 1.37) | 0.8810  | 1.0000 | 0.81<br>(0.56, 1.17) | 0.2565  | 1.0000 | 0.9797                | 0.2996                           |
| rs7598826  | A > G  | 0.44 | NPAS2 | intron   | 0.93<br>(0.80, 1.07) | 0.3016  | 1.0000 | 1.02<br>(0.82, 1.27) | 0.8818  | 1.0000 | 0.83<br>(0.63, 1.09) | 0.1706  | 1.0000 | 0.9852                | 0.2436                           |
| rs930309   | A > T  | 0.24 | NPAS2 | intron   | 1.05<br>(0.89, 1.23) | 0.5822  | 1.0000 | 1.20<br>(0.93, 1.55) | 0.1553  | 1.0000 | 0.95<br>(0.70, 1.28) | 0.7235  | 1.0000 | 0.3786                | 0.2367                           |
| rs12472321 | A > G  | 0.30 | NPAS2 | intron   | 0.98<br>(0.84, 1.15) | 0.8062  | 1.0000 | 1.08<br>(0.85, 1.37) | 0.5377  | 1.0000 | 0.97<br>(0.73, 1.29) | 0.8322  | 1.0000 | 0.8395                | 0.6056                           |
| rs2871389  | A > G  | 0.30 | NPAS2 | intron   | 0.99<br>(0.85, 1.15) | 0.8591  | 1.0000 | 1.09<br>(0.86, 1.38) | 0.4816  | 1.0000 | 0.99<br>(0.74, 1.31) | 0.9330  | 1.0000 | 0.7925                | 0.6360                           |
| rs6740935  | G > A  | 0.38 | NPAS2 | intron   | 0.93<br>(0.81, 1.08) | 0.3486  | 1.0000 | 0.98<br>(0.79, 1.22) | 0.8755  | 1.0000 | 0.87<br>(0.66, 1.15) | 0.3174  | 1.0000 | 0.9882                | 0.5261                           |
| rs12712083 | A > G  | 0.45 | NPAS2 | intron   | 0.94<br>(0.82, 1.08) | 0.4147  | 1.0000 | 0.98<br>(0.79, 1.20) | 0.8151  | 1.0000 | 0.93<br>(0.72, 1.20) | 0.5756  | 1.0000 | 0.9803                | 0.8033                           |
| rs1369481  | G > A  | 0.29 | NPAS2 | intron   | 1.05<br>(0.90, 1.23) | 0.5175  | 1.0000 | 1.15<br>(0.91, 1.46) | 0.2440  | 1.0000 | 0.91<br>(0.68, 1.22) | 0.5360  | 1.0000 | 0.5268                | 0.2362                           |
| rs17654772 | G > A  | 0.25 | NPAS2 | intron   | 1.02<br>(0.86, 1.20) | 0.8506  | 1.0000 | 0.86<br>(0.67, 1.11) | 0.2427  | 1.0000 | 1.19<br>(0.89, 1.60) | 0.2461  | 1.0000 | 0.5101                | 0.1172                           |
| rs4851377  | A > G  | 0.46 | NPAS2 | intron   | 1.01<br>(0.88, 1.16) | 0.9178  | 1.0000 | 1.09<br>(0.88, 1.36) | 0.4180  | 1.0000 | 0.93<br>(0.72, 1.21) | 0.6074  | 1.0000 | 0.6947                | 0.3639                           |
| rs920085   | G > A  | 0.28 | NPAS2 | intron   | 1.01<br>(0.86, 1.18) | 0.9046  | 1.0000 | 1.11<br>(0.88, 1.41) | 0.3671  | 1.0000 | 0.93<br>(0.69, 1.24) | 0.6208  | 1.0000 | 0.6309                | 0.3167                           |
| rs13394520 | A > G  | 0.41 | NPAS2 | intron   | 1.01<br>(0.88, 1.16) | 0.8874  | 1.0000 | 0.90<br>(0.73, 1.11) | 0.3244  | 1.0000 | 1.14<br>(0.88, 1.46) | 0.3257  | 1.0000 | 0.6035                | 0.1646                           |
| rs356656   | C > G  | 0.17 | NPAS2 | intron   | 0.99<br>(0.82, 1.19) | 0.9029  | 1.0000 | 0.98<br>(0.74, 1.30) | 0.8896  | 1.0000 | 1.01<br>(0.71, 1.43) | 0.9797  | 1.0000 | 0.9910                | 0.8775                           |

| SNP        | Allele | MAF  | Gene  | Location | Main Effect Analysis |         |        | <24mo Shift-work     |         |        | ≥24mo Shift-work     |         |        | Joint Test | Interac-<br>tion Term |
|------------|--------|------|-------|----------|----------------------|---------|--------|----------------------|---------|--------|----------------------|---------|--------|------------|-----------------------|
|            |        |      |       |          | OR (CI)              | P-value | P-perm | OR (CI)              | P-value | P-perm | OR (CI)              | P-value | P-perm | P-value    | P-value               |
| rs11894671 | C > A  | 0.23 | NPAS2 | intron   | 1.02<br>(0.86, 1.20) | 0.8582  | 1.0000 | 0.86<br>(0.66, 1.12) | 0.2677  | 1.0000 | 1.16<br>(0.86, 1.56) | 0.3199  | 1.0000 | 0.5346     | 0.1514                |
| rs356643   | A > G  | 0.46 | NPAS2 | intron   | 1.02<br>(0.89, 1.17) | 0.7837  | 1.0000 | 1.05<br>(0.85, 1.29) | 0.6793  | 1.0000 | 1.00<br>(0.78, 1.29) | 0.9963  | 1.0000 | 0.9039     | 0.7943                |
| rs6725296  | G > A  | 0.19 | NPAS2 | intron   | 1.01<br>(0.84, 1.21) | 0.9101  | 1.0000 | 1.14<br>(0.87, 1.50) | 0.3449  | 1.0000 | 0.85<br>(0.60, 1.21) | 0.3684  | 1.0000 | 0.6070     | 0.1824                |
| rs13026599 | A > G  | 0.18 | NPAS2 | intron   | 0.99<br>(0.83, 1.18) | 0.8965  | 1.0000 | 0.92<br>(0.69, 1.22) | 0.5491  | 1.0000 | 1.02<br>(0.74, 1.42) | 0.8964  | 1.0000 | 0.8281     | 0.5909                |
| rs17717414 | A > G  | 0.19 | NPAS2 | intron   | 1.02<br>(0.85, 1.21) | 0.8632  | 1.0000 | 1.10<br>(0.84, 1.45) | 0.4733  | 1.0000 | 0.82<br>(0.58, 1.16) | 0.2607  | 1.0000 | 0.7646     | 0.2046                |
| rs3754674  | G > C  | 0.40 | NPAS2 | intron   | 0.95<br>(0.82, 1.09) | 0.4491  | 1.0000 | 0.96<br>(0.77, 1.21) | 0.7546  | 1.0000 | 0.94<br>(0.72, 1.22) | 0.6273  | 1.0000 | 0.9639     | 0.8141                |
| rs13025524 | G > A  | 0.33 | NPAS2 | intron   | 0.91<br>(0.78, 1.06) | 0.2174  | 0.9971 | 0.99<br>(0.79, 1.25) | 0.9562  | 1.0000 | 0.88<br>(0.67, 1.16) | 0.3719  | 1.0000 | 1.0000     | 0.4562                |
| rs11688832 | C > A  | 0.22 | NPAS2 | intron   | 0.97<br>(0.82, 1.15) | 0.7428  | 1.0000 | 1.03<br>(0.80, 1.32) | 0.8261  | 1.0000 | 0.91<br>(0.66, 1.25) | 0.5549  | 1.0000 | 0.9722     | 0.5837                |
| rs3768984  | A > C  | 0.25 | NPAS2 | intron   | 0.99<br>(0.85, 1.16) | 0.9372  | 1.0000 | 0.94<br>(0.73, 1.21) | 0.6070  | 1.0000 | 1.03<br>(0.77, 1.36) | 0.8480  | 1.0000 | 0.8661     | 0.6091                |
| rs17025005 | G > A  | 0.18 | NPAS2 | intron   | 0.91<br>(0.76, 1.09) | 0.3206  | 1.0000 | 1.06<br>(0.80, 1.40) | 0.6983  | 1.0000 | 0.88<br>(0.64, 1.22) | 0.4536  | 1.0000 | 0.9217     | 0.3910                |
| rs7605570  | G > A  | 0.39 | NPAS2 | intron   | 0.88<br>(0.76, 1.01) | 0.0707  | 0.9963 | 0.72<br>(0.57, 0.90) | 0.0050  | 0.5975 | 1.01<br>(0.78, 1.31) | 0.9210  | 1.0000 | 0.0209     | 0.0547                |
| rs12712085 | G > A  | 0.42 | NPAS2 | intron   | 0.87<br>(0.75, 1.00) | 0.0497  | 0.9969 | 0.69<br>(0.55, 0.87) | 0.0016  | 0.3523 | 1.05<br>(0.81, 1.35) | 0.7205  | 1.0000 | 0.0073     | 0.0187                |
| rs3820787  | G > A  | 0.35 | NPAS2 | intron   | 0.90<br>(0.78, 1.04) | 0.1612  | 1.0000 | 0.69<br>(0.54, 0.87) | 0.0016  | 0.4428 | 1.04<br>(0.80, 1.35) | 0.7506  | 1.0000 | 0.0071     | 0.0164                |
| rs10191450 | G > A  | 0.37 | NPAS2 | intron   | 1.12<br>(0.97, 1.29) | 0.1202  | 1.0000 | 1.37<br>(1.09, 1.71) | 0.0062  | 0.9992 | 0.89<br>(0.68, 1.16) | 0.3822  | 1.0000 | 0.0239     | 0.0148                |
| rs4851390  | A > G  | 0.19 | NPAS2 | intron   | 1.03<br>(0.87, 1.22) | 0.7379  | 1.0000 | 1.05<br>(0.81, 1.36) | 0.7173  | 1.0000 | 1.05<br>(0.76, 1.44) | 0.7843  | 1.0000 | 0.9503     | 0.9705                |

| SNP        | Allele | MAF  | Gene  | Location          | Main Effect Analysis |         |        | <24mo Shift-work     |         |        | ≥24mo Shift-work     |         |        | Joint Test | Interac-<br>tion Term |
|------------|--------|------|-------|-------------------|----------------------|---------|--------|----------------------|---------|--------|----------------------|---------|--------|------------|-----------------------|
|            |        |      |       |                   | OR (CI)              | P-value | P-perm | OR (CI)              | P-value | P-perm | OR (CI)              | P-value | P-perm | P-value    | P-value               |
| rs882272   | G > A  | 0.42 | NPAS2 | intron            | 1.12<br>(0.97, 1.28) | 0.1244  | 1.0000 | 1.38<br>(1.10, 1.72) | 0.0055  | 0.7185 | 0.93<br>(0.72, 1.20) | 0.5626  | 1.0000 | 0.0200     | 0.0260                |
| rs17020663 | G > C  | 0.13 | NPAS2 | intron            | 0.98<br>(0.80, 1.21) | 0.8769  | 1.0000 | 1.10<br>(0.80, 1.50) | 0.5669  | 1.0000 | 0.92<br>(0.63, 1.35) | 0.6631  | 1.0000 | 0.8392     | 0.4462                |
| rs6747755  | G > A  | 0.22 | NPAS2 | intron            | 0.97<br>(0.82, 1.15) | 0.7454  | 1.0000 | 1.12<br>(0.87, 1.45) | 0.3664  | 1.0000 | 0.79<br>(0.57, 1.09) | 0.1528  | 1.0000 | 0.6655     | 0.0745                |
| rs7581886  | A > G  | 0.14 | NPAS2 | intron            | 0.84<br>(0.68, 1.04) | 0.1082  | 0.9935 | 0.65<br>(0.46, 0.91) | 0.0127  | 0.7628 | 1.17<br>(0.80, 1.71) | 0.4109  | 1.0000 | 0.0448     | 0.0210                |
| rs4851392  | G > A  | 0.28 | NPAS2 | intron            | 0.87<br>(0.75, 1.02) | 0.0852  | 0.9987 | 0.65<br>(0.51, 0.84) | 0.0009  | 0.0029 | 1.13<br>(0.85, 1.48) | 0.4007  | 1.0000 | 0.0044     | 0.0040                |
| rs1562313  | G > A  | 0.19 | NPAS2 | coding            | 1.04<br>(0.87, 1.24) | 0.6566  | 1.0000 | 1.22<br>(0.94, 1.60) | 0.1409  | 1.0000 | 0.98<br>(0.71, 1.36) | 0.8967  | 1.0000 | 0.3356     | 0.2934                |
| rs2305160  | G > A  | 0.34 | NPAS2 | coding            | 0.90<br>(0.78, 1.04) | 0.1592  | 1.0000 | 0.65<br>(0.51, 0.82) | 0.0003  | 0.0029 | 1.19<br>(0.93, 1.54) | 0.1734  | 1.0000 | 0.0014     | 0.0005                |
| rs2305159  | A > C  | 0.28 | NPAS2 | intron            | 1.03<br>(0.88, 1.19) | 0.7452  | 1.0000 | 1.12<br>(0.89, 1.41) | 0.3267  | 1.0000 | 0.93<br>(0.70, 1.24) | 0.6229  | 1.0000 | 0.6145     | 0.2949                |
| rs6719533  | A > G  | 0.46 | NPAS2 | intron            | 1.04<br>(0.90, 1.19) | 0.6247  | 1.0000 | 1.16<br>(0.93, 1.45) | 0.1841  | 1.0000 | 0.84<br>(0.65, 1.07) | 0.1600  | 1.0000 | 0.3699     | 0.0441                |
| rs3754678  | G > A  | 0.38 | NPAS2 | intron            | 0.99<br>(0.86, 1.14) | 0.8798  | 1.0000 | 1.03<br>(0.82, 1.28) | 0.8231  | 1.0000 | 0.99<br>(0.76, 1.29) | 0.9325  | 1.0000 | 0.9769     | 0.8226                |
| rs3768993  | G > A  | 0.48 | NPAS2 | intron            | 0.92<br>(0.80, 1.06) | 0.2512  | 0.9996 | 0.87<br>(0.70, 1.07) | 0.1847  | 0.9998 | 1.08<br>(0.83, 1.41) | 0.5745  | 1.0000 | 0.4197     | 0.2169                |
| rs11123857 | A > G  | 0.28 | NPAS2 | intron            | 1.18<br>(1.02, 1.38) | 0.0307  | 0.9988 | 1.17<br>(0.92, 1.49) | 0.1923  | 1.0000 | 0.94<br>(0.70, 1.25) | 0.6552  | 1.0000 | 0.4848     | 0.3007                |
| rs1867861  | G > C  | 0.47 | NPAS2 | intron            | 0.95<br>(0.83, 1.09) | 0.4784  | 1.0000 | 0.90<br>(0.73, 1.11) | 0.3059  | 1.0000 | 1.12<br>(0.85, 1.46) | 0.4207  | 1.0000 | 0.6063     | 0.2171                |
| rs9223     | G > A  | 0.32 | NPAS2 | coding            | 1.00<br>(0.86, 1.16) | 0.9916  | 1.0000 | 0.93<br>(0.74, 1.17) | 0.5400  | 1.0000 | 1.14<br>(0.86, 1.51) | 0.3508  | 1.0000 | 0.8224     | 0.2817                |
| rs935401   | A > T  | 0.45 | NPAS2 | flanking_3UT<br>R | 1.09<br>(0.95, 1.25) | 0.2330  | 1.0000 | 1.01<br>(0.82, 1.26) | 0.8967  | 1.0000 | 1.06<br>(0.82, 1.38) | 0.6605  | 1.0000 | 0.9949     | 0.7972                |

| SNP        | Allele | MAF  | Gene     | Location          | Main Effect Analysis |         |        | <24mo Shift-work     |         |        | ≥24mo Shift-work     |         |        | Joint Test | Interac-<br>tion Term |
|------------|--------|------|----------|-------------------|----------------------|---------|--------|----------------------|---------|--------|----------------------|---------|--------|------------|-----------------------|
|            |        |      |          |                   | OR (CI)              | P-value | P-perm | OR (CI)              | P-value | P-perm | OR (CI)              | P-value | P-perm | P-value    | P-value               |
| rs1374324  | G > A  | 0.33 | NPAS2    | flanking_3UT<br>R | 0.93<br>(0.80, 1.07) | 0.3127  | 1.0000 | 0.95<br>(0.76, 1.18) | 0.6336  | 1.0000 | 1.00<br>(0.75, 1.32) | 0.9746  | 1.0000 | 0.8987     | 0.8135                |
| rs13417456 | A > G  | 0.22 | NPAS2    | flanking_3UT<br>R | 0.96<br>(0.82, 1.14) | 0.6682  | 1.0000 | 1.05<br>(0.82, 1.35) | 0.6948  | 1.0000 | 0.91<br>(0.67, 1.24) | 0.5595  | 1.0000 | 0.9206     | 0.5023                |
| rs6735304  | G > A  | 0.35 | NPAS2    | downstream        | 1.07<br>(0.93, 1.23) | 0.3690  | 1.0000 | 1.16<br>(0.94, 1.45) | 0.1689  | 1.0000 | 0.88<br>(0.68, 1.15) | 0.3545  | 1.0000 | 0.3839     | 0.1284                |
| rs2278724  | C > G  | 0.20 | NPAS2    | downstream        | 0.92<br>(0.77, 1.10) | 0.3410  | 1.0000 | 0.80<br>(0.60, 1.05) | 0.1094  | 0.9197 | 0.92<br>(0.67, 1.28) | 0.6400  | 1.0000 | 0.2841     | 0.4954                |
| rs13397106 | G > A  | 0.20 | SERPINE2 | intron            | 1.09<br>(0.92, 1.30) | 0.3040  | 1.0000 | 1.09<br>(0.84, 1.42) | 0.5238  | 1.0000 | 1.17<br>(0.85, 1.62) | 0.3241  | 1.0000 | 0.8382     | 0.6997                |
| rs2305174  | G > A  | 0.16 | PER2     | upstream          | 0.95<br>(0.78, 1.14) | 0.5658  | 1.0000 | 1.02<br>(0.76, 1.36) | 0.9133  | 1.0000 | 0.88<br>(0.63, 1.23) | 0.4447  | 1.0000 | 0.9978     | 0.5172                |
| rs7584376  | C > A  | 0.32 | PER2     | upstream          | 1.04<br>(0.90, 1.20) | 0.6136  | 1.0000 | 1.01<br>(0.80, 1.29) | 0.9155  | 1.0000 | 0.99<br>(0.76, 1.29) | 0.9226  | 1.0000 | 0.9924     | 0.9186                |
| rs11696058 | G > A  | 0.32 | PER2     | upstream          | 1.04<br>(0.90, 1.20) | 0.6152  | 1.0000 | 0.95<br>(0.75, 1.21) | 0.6779  | 1.0000 | 0.98<br>(0.75, 1.28) | 0.8876  | 1.0000 | 0.9202     | 0.8207                |
| rs11894535 | G > A  | 0.22 | PER2     | intron            | 0.95<br>(0.80, 1.12) | 0.5291  | 1.0000 | 0.90<br>(0.69, 1.17) | 0.4243  | 1.0000 | 0.87<br>(0.65, 1.17) | 0.3533  | 1.0000 | 0.7122     | 0.9134                |
| rs2304674  | A > G  | 0.28 | PER2     | intron            | 0.98<br>(0.84, 1.14) | 0.7806  | 1.0000 | 0.98<br>(0.77, 1.26) | 0.8960  | 1.0000 | 0.92<br>(0.70, 1.22) | 0.5714  | 1.0000 | 0.9833     | 0.7691                |
| rs10462023 | G > A  | 0.36 | PER2     | intron            | 1.01<br>(0.87, 1.17) | 0.8800  | 1.0000 | 0.96<br>(0.77, 1.20) | 0.7327  | 1.0000 | 1.04<br>(0.79, 1.37) | 0.7574  | 1.0000 | 0.9317     | 0.6370                |
| rs4663302  | G > A  | 0.34 | PER2     | flanking_5UT<br>R | 1.00<br>(0.86, 1.16) | 0.9968  | 1.0000 | 1.06<br>(0.84, 1.32) | 0.6386  | 1.0000 | 0.96<br>(0.73, 1.26) | 0.7457  | 1.0000 | 0.8603     | 0.5573                |
| rs7681432  | G > A  | 0.28 | CLOCK    | upstream          | 0.90<br>(0.77, 1.04) | 0.1635  | 0.9996 | 0.85<br>(0.67, 1.07) | 0.1691  | 1.0000 | 0.99<br>(0.75, 1.31) | 0.9472  | 1.0000 | 0.3993     | 0.4122                |
| rs4864539  | A > G  | 0.34 | CLOCK    | upstream          | 0.99<br>(0.85, 1.14) | 0.8545  | 1.0000 | 1.01<br>(0.81, 1.27) | 0.9108  | 1.0000 | 0.99<br>(0.76, 1.30) | 0.9482  | 1.0000 | 0.9953     | 0.9052                |
| rs4864540  | G > A  | 0.30 | CLOCK    | upstream          | 0.97<br>(0.83, 1.13) | 0.7064  | 1.0000 | 1.04<br>(0.82, 1.32) | 0.7333  | 1.0000 | 0.96<br>(0.73, 1.26) | 0.7763  | 1.0000 | 0.9567     | 0.6863                |

| SNP        | Allele | MAF  | Gene     | Location      | Main Effect Analysis |         |        | <24mo Shift-work     |         |        | ≥24mo Shift-work     |         |        | Joint Test | Interac-<br>tion Term |
|------------|--------|------|----------|---------------|----------------------|---------|--------|----------------------|---------|--------|----------------------|---------|--------|------------|-----------------------|
|            |        |      |          |               | OR (CI)              | P-value | P-perm | OR (CI)              | P-value | P-perm | OR (CI)              | P-value | P-perm | P-value    | P-value               |
| rs17776421 | G > A  | 0.39 | CLOCK    | upstream      | 0.96<br>(0.83, 1.11) | 0.5710  | 1.0000 | 0.95<br>(0.76, 1.18) | 0.6493  | 1.0000 | 1.05<br>(0.81, 1.38) | 0.7034  | 1.0000 | 0.8951     | 0.5116                |
| rs6837871  | G > A  | 0.22 | CLOCK    | upstream      | 1.04<br>(0.88, 1.22) | 0.6789  | 1.0000 | 1.06<br>(0.82, 1.37) | 0.6782  | 1.0000 | 1.01<br>(0.75, 1.36) | 0.9369  | 1.0000 | 0.9288     | 0.8735                |
| rs11133373 | C > G  | 0.32 | CLOCK    | upstream      | 1.10<br>(0.95, 1.27) | 0.2056  | 1.0000 | 1.13<br>(0.90, 1.41) | 0.2990  | 1.0000 | 1.27<br>(0.97, 1.66) | 0.0770  | 1.0000 | 0.5630     | 0.5336                |
| rs11133375 | G > A  | 0.49 | CLOCK    | upstream      | 1.09<br>(0.95, 1.24) | 0.2205  | 0.9999 | 1.09<br>(0.88, 1.34) | 0.4381  | 1.0000 | 0.83<br>(0.65, 1.06) | 0.1341  | 0.9891 | 0.7412     | 0.5172                |
| rs501679   | A > G  | 0.34 | CLOCK    | upstream      | 0.91<br>(0.79, 1.05) | 0.1930  | 1.0000 | 0.93<br>(0.74, 1.17) | 0.5532  | 1.0000 | 0.89<br>(0.69, 1.15) | 0.3727  | 1.0000 | 0.8343     | 0.8191                |
| rs819270   | G > A  | 0.30 | CLOCK    | upstream      | 0.97<br>(0.84, 1.12) | 0.6889  | 1.0000 | 0.96<br>(0.76, 1.21) | 0.7107  | 1.0000 | 0.91<br>(0.70, 1.19) | 0.4955  | 1.0000 | 0.9391     | 0.7814                |
| rs4864984  | G > A  | 0.19 | CLOCK    | upstream      | 0.83<br>(0.69, 0.99) | 0.0366  | 0.7422 | 0.86<br>(0.66, 1.13) | 0.2890  | 1.0000 | 0.72<br>(0.51, 1.02) | 0.0652  | 0.9405 | 0.5660     | 0.4390                |
| rs11945371 | C > A  | 0.32 | CLOCK    | upstream      | 1.15<br>(1.00, 1.34) | 0.0535  | 0.9036 | 1.10<br>(0.88, 1.38) | 0.4181  | 1.0000 | 1.21<br>(0.93, 1.57) | 0.1532  | 1.0000 | 0.7112     | 0.6192                |
| rs11943456 | A > G  | 0.47 | CLOCK    | upstream      | 1.17<br>(1.02, 1.34) | 0.0259  | 0.8102 | 1.11<br>(0.89, 1.37) | 0.3571  | 1.0000 | 0.80<br>(0.63, 1.02) | 0.0750  | 0.9548 | 0.6572     | 0.4656                |
| rs17776975 | G > A  | 0.28 | CLOCK    | upstream      | 0.94<br>(0.81, 1.09) | 0.4380  | 1.0000 | 0.94<br>(0.75, 1.19) | 0.6013  | 1.0000 | 0.91<br>(0.69, 1.19) | 0.4853  | 1.0000 | 0.8750     | 0.8625                |
| rs1801260  | A > G  | 0.28 | CLOCK    | 3UTR          | 0.94<br>(0.81, 1.09) | 0.4381  | 1.0000 | 0.95<br>(0.76, 1.20) | 0.6914  | 1.0000 | 0.89<br>(0.68, 1.16) | 0.3850  | 1.0000 | 0.9273     | 0.6889                |
| rs9791094  | A > G  | 0.46 | FLJ41309 | flanking_3UTR | 0.98<br>(0.85, 1.12) | 0.7390  | 1.0000 | 0.91<br>(0.73, 1.13) | 0.3966  | 1.0000 | 1.09<br>(0.84, 1.41) | 0.5301  | 1.0000 | 0.7156     | 0.2966                |
| rs10045427 | A > C  | 0.30 | CSNK1A1  | flanking_3UTR | 1.03<br>(0.88, 1.19) | 0.7212  | 1.0000 | 0.98<br>(0.78, 1.23) | 0.8830  | 1.0000 | 0.98<br>(0.74, 1.30) | 0.8833  | 1.0000 | 0.9822     | 0.9814                |
| rs6886243  | A > G  | 0.25 | CSNK1A1  | intron        | 0.96<br>(0.82, 1.12) | 0.5957  | 1.0000 | 0.96<br>(0.74, 1.23) | 0.7252  | 1.0000 | 1.14<br>(0.86, 1.52) | 0.3694  | 1.0000 | 0.9474     | 0.4226                |
| rs2077482  | A > T  | 0.28 | CSNK1A1  | intron        | 0.99<br>(0.85, 1.15) | 0.8928  | 1.0000 | 0.93<br>(0.74, 1.18) | 0.5453  | 1.0000 | 0.91<br>(0.68, 1.21) | 0.4967  | 1.0000 | 0.8230     | 0.9133                |

| SNP        | Allele | MAF  | Gene       | Location       | Main Effect Analysis |         |        | <24mo Shift-work     |         |        | ≥24mo Shift-work     |         |        | Joint Test | Interac-<br>tion Term |
|------------|--------|------|------------|----------------|----------------------|---------|--------|----------------------|---------|--------|----------------------|---------|--------|------------|-----------------------|
|            |        |      |            |                | OR (CI)              | P-value | P-perm | OR (CI)              | P-value | P-perm | OR (CI)              | P-value | P-perm | P-value    | P-value               |
| rs1947582  | G > A  | 0.48 | CSNK1 A1   | intron         | 0.96<br>(0.83, 1.10) | 0.5294  | 1.0000 | 0.94<br>(0.76, 1.18) | 0.6157  | 1.0000 | 0.98<br>(0.76, 1.27) | 0.8809  | 1.0000 | 0.8952     | 0.9175                |
| rs7712431  | A > G  | 0.17 | CSNK1 A1   | intron         | 1.07<br>(0.89, 1.29) | 0.4616  | 1.0000 | 1.07<br>(0.80, 1.43) | 0.6474  | 1.0000 | 0.96<br>(0.69, 1.36) | 0.8375  | 1.0000 | 0.9130     | 0.6691                |
| rs10058728 | T > A  | 0.45 | CSNK1 A1   | intron         | 1.07<br>(0.93, 1.23) | 0.3341  | 1.0000 | 1.12<br>(0.90, 1.39) | 0.3070  | 1.0000 | 1.04<br>(0.80, 1.34) | 0.7823  | 1.0000 | 0.6106     | 0.7331                |
| rs12201804 | G > A  | 0.15 | LOC643 954 | flanking_3UT R | 0.90<br>(0.74, 1.09) | 0.2628  | 1.0000 | 1.08<br>(0.80, 1.45) | 0.6393  | 1.0000 | 0.78<br>(0.54, 1.12) | 0.1760  | 1.0000 | 0.8934     | 0.1901                |
| rs7809903  | C > G  | 0.43 | NXP1       | flanking_3UT R | 1.06<br>(0.92, 1.22) | 0.4280  | 1.0000 | 1.15<br>(0.92, 1.43) | 0.2152  | 1.0000 | 1.02<br>(0.78, 1.33) | 0.8772  | 1.0000 | 0.4980     | 0.5077                |
| rs2188253  | G > A  | 0.30 | LOC645 680 | flanking_5UT R | 1.01<br>(0.86, 1.17) | 0.9385  | 1.0000 | 1.05<br>(0.83, 1.33) | 0.6922  | 1.0000 | 0.97<br>(0.74, 1.28) | 0.8418  | 1.0000 | 0.9346     | 0.6631                |
| rs7823976  | A > G  | 0.48 | NAT1       | flanking_5UT R | 0.99<br>(0.86, 1.14) | 0.8871  | 1.0000 | 0.96<br>(0.78, 1.19) | 0.7023  | 1.0000 | 0.99<br>(0.76, 1.28) | 0.9258  | 1.0000 | 0.9388     | 0.9290                |
| rs6586710  | A > T  | 0.30 | NAT1       | flanking_5UT R | 1.02<br>(0.88, 1.19) | 0.7968  | 1.0000 | 0.94<br>(0.74, 1.18) | 0.5696  | 1.0000 | 1.05<br>(0.79, 1.40) | 0.7351  | 1.0000 | 0.8315     | 0.4849                |
| rs4921877  | A > T  | 0.26 | NAT1       | flanking_5UT R | 0.94<br>(0.81, 1.10) | 0.4706  | 1.0000 | 0.88<br>(0.69, 1.12) | 0.2956  | 1.0000 | 0.88<br>(0.66, 1.18) | 0.3923  | 1.0000 | 0.5457     | 0.9161                |
| rs10888150 | G > A  | 0.42 | NAT1       | flanking_5UT R | 1.02<br>(0.89, 1.18) | 0.7464  | 1.0000 | 1.01<br>(0.81, 1.25) | 0.9425  | 1.0000 | 0.99<br>(0.76, 1.29) | 0.9364  | 1.0000 | 0.9976     | 0.9690                |
| rs6586712  | A > C  | 0.35 | NAT1       | flanking_5UT R | 0.98<br>(0.85, 1.13) | 0.7772  | 1.0000 | 0.94<br>(0.75, 1.18) | 0.5940  | 1.0000 | 0.90<br>(0.69, 1.18) | 0.4336  | 1.0000 | 0.8607     | 0.8353                |
| rs4921581  | G > A  | 0.32 | NAT1       | intron         | 1.11<br>(0.95, 1.28) | 0.1811  | 1.0000 | 1.19<br>(0.95, 1.50) | 0.1296  | 0.9676 | 1.10<br>(0.85, 1.44) | 0.4624  | 1.0000 | 0.3022     | 0.6733                |
| rs2172426  | A > G  | 0.46 | NAT2       | upstream       | 1.03<br>(0.90, 1.18) | 0.6934  | 1.0000 | 1.09<br>(0.88, 1.36) | 0.4151  | 1.0000 | 1.09<br>(0.85, 1.40) | 0.4807  | 1.0000 | 0.6979     | 0.9800                |
| rs1495750  | G > A  | 0.45 | NAT2       | upstream       | 1.00<br>(0.87, 1.15) | 0.9939  | 1.0000 | 0.94<br>(0.76, 1.16) | 0.5678  | 1.0000 | 1.17<br>(0.91, 1.50) | 0.2224  | 1.0000 | 0.8614     | 0.2032                |
| rs17595174 | C > A  | 0.34 | NAT2       | upstream       | 0.97<br>(0.84, 1.12) | 0.7061  | 1.0000 | 0.97<br>(0.78, 1.22) | 0.8059  | 1.0000 | 0.81<br>(0.62, 1.05) | 0.1109  | 1.0000 | 0.9711     | 0.3031                |



| SNP        | Allele | MAF  | Gene          | Location          | Main Effect Analysis |         |        | <24mo Shift-work     |         |        | ≥24mo Shift-work     |         |        | Joint Test P-value | Interaction Term P-value |
|------------|--------|------|---------------|-------------------|----------------------|---------|--------|----------------------|---------|--------|----------------------|---------|--------|--------------------|--------------------------|
|            |        |      |               |                   | OR (CI)              | P-value | P-perm | OR (CI)              | P-value | P-perm | OR (CI)              | P-value | P-perm |                    |                          |
| rs7016785  | A > G  | 0.33 | NAT2          | upstream          | 1.01<br>(0.88, 1.17) | 0.8886  | 1.0000 | 0.95<br>(0.76, 1.20) | 0.6763  | 1.0000 | 1.03<br>(0.79, 1.34) | 0.8373  | 1.0000 | 0.9266             | 0.7008                   |
| rs4646246  | A > G  | 0.17 | NAT2          | flanking_5UT<br>R | 0.97<br>(0.81, 1.16) | 0.7299  | 1.0000 | 0.85<br>(0.63, 1.15) | 0.2936  | 1.0000 | 1.25<br>(0.92, 1.69) | 0.1494  | 1.0000 | 0.5724             | 0.0770                   |
| rs7011792  | C > G  | 0.40 | NAT2          | intron            | 0.97<br>(0.85, 1.12) | 0.7240  | 1.0000 | 0.96<br>(0.77, 1.20) | 0.7058  | 1.0000 | 0.80<br>(0.62, 1.04) | 0.0960  | 0.9997 | 0.9289             | 0.3108                   |
| rs1961456  | A > G  | 0.30 | NAT2          | intron            | 0.97<br>(0.84, 1.14) | 0.7397  | 1.0000 | 0.98<br>(0.77, 1.24) | 0.8496  | 1.0000 | 1.14<br>(0.86, 1.50) | 0.3566  | 1.0000 | 0.9770             | 0.4027                   |
| rs1801280  | A > G  | 0.44 | NAT2          | coding            | 1.00<br>(0.87, 1.14) | 0.9442  | 1.0000 | 1.03<br>(0.83, 1.28) | 0.7987  | 1.0000 | 0.86<br>(0.67, 1.11) | 0.2354  | 1.0000 | 0.9694             | 0.2744                   |
| rs721399   | A > G  | 0.29 | NAT2          | flanking_3UT<br>R | 0.92<br>(0.79, 1.08) | 0.2975  | 1.0000 | 0.91<br>(0.71, 1.16) | 0.4351  | 1.0000 | 1.04<br>(0.79, 1.37) | 0.7790  | 1.0000 | 0.7376             | 0.4616                   |
| rs4646257  | G > A  | 0.18 | NAT2          | flanking_3UT<br>R | 0.89<br>(0.74, 1.07) | 0.2156  | 0.9998 | 0.80<br>(0.59, 1.08) | 0.1439  | 0.9941 | 1.12<br>(0.82, 1.51) | 0.4791  | 1.0000 | 0.3437             | 0.1321                   |
| rs12676857 | A > G  | 0.15 | NAT2          | flanking_3UT<br>R | 0.89<br>(0.73, 1.09) | 0.2451  | 1.0000 | 0.74<br>(0.53, 1.04) | 0.0794  | 0.9451 | 1.21<br>(0.87, 1.66) | 0.2531  | 1.0000 | 0.2119             | 0.0395                   |
| rs2410562  | A > G  | 0.41 | NAT2          | flanking_3UT<br>R | 1.06<br>(0.92, 1.22) | 0.4038  | 1.0000 | 1.13<br>(0.91, 1.41) | 0.2751  | 1.0000 | 1.02<br>(0.79, 1.31) | 0.9041  | 1.0000 | 0.5476             | 0.5429                   |
| rs10828243 | G > A  | 0.25 | LOC729<br>243 | flanking_3UT<br>R | 1.13<br>(0.96, 1.32) | 0.1394  | 0.9996 | 1.13<br>(0.88, 1.44) | 0.3380  | 1.0000 | 1.04<br>(0.78, 1.39) | 0.8029  | 1.0000 | 0.6631             | 0.7338                   |
| rs7942486  | A > C  | 0.44 | ARNTL         | flanking_5UT<br>R | 0.95<br>(0.82, 1.09) | 0.4551  | 1.0000 | 0.90<br>(0.72, 1.12) | 0.3425  | 1.0000 | 1.00<br>(0.78, 1.29) | 0.9778  | 1.0000 | 0.6145             | 0.5116                   |
| rs11022742 | A > G  | 0.27 | ARNTL         | flanking_5UT<br>R | 1.00<br>(0.85, 1.17) | 0.9753  | 1.0000 | 1.01<br>(0.79, 1.28) | 0.9474  | 1.0000 | 1.17<br>(0.88, 1.56) | 0.2741  | 1.0000 | 0.9995             | 0.4292                   |
| rs7950226  | G > A  | 0.46 | ARNTL         | intron            | 1.03<br>(0.90, 1.19) | 0.6437  | 1.0000 | 0.92<br>(0.74, 1.15) | 0.4712  | 1.0000 | 1.07<br>(0.83, 1.38) | 0.5995  | 1.0000 | 0.7761             | 0.3788                   |
| rs10766074 | A > G  | 0.17 | ARNTL         | intron            | 0.94<br>(0.78, 1.13) | 0.4819  | 1.0000 | 0.97<br>(0.73, 1.30) | 0.8505  | 1.0000 | 0.98<br>(0.70, 1.38) | 0.9263  | 1.0000 | 0.9743             | 0.9883                   |
| rs4757144  | A > G  | 0.41 | ARNTL         | intron            | 0.92<br>(0.80, 1.06) | 0.2490  | 1.0000 | 0.88<br>(0.71, 1.10) | 0.2544  | 1.0000 | 0.94<br>(0.73, 1.21) | 0.6157  | 1.0000 | 0.5118             | 0.7050                   |

| SNP        | Allele | MAF  | Gene  | Location   | Main Effect Analysis |         |        | <24mo Shift-work     |         |        | ≥24mo Shift-work     |         |        | Joint Test<br>P-value | Interac-<br>tion Term<br>P-value |
|------------|--------|------|-------|------------|----------------------|---------|--------|----------------------|---------|--------|----------------------|---------|--------|-----------------------|----------------------------------|
|            |        |      |       |            | OR (CI)              | P-value | P-perm | OR (CI)              | P-value | P-perm | OR (CI)              | P-value | P-perm |                       |                                  |
| rs11022765 | C > A  | 0.25 | ARNTL | intron     | 0.97<br>(0.82, 1.13) | 0.6731  | 1.0000 | 1.07<br>(0.83, 1.37) | 0.5907  | 1.0000 | 1.01<br>(0.75, 1.34) | 0.9720  | 1.0000 | 0.8727                | 0.7342                           |
| rs6486121  | A > G  | 0.37 | ARNTL | intron     | 1.00<br>(0.86, 1.15) | 0.9549  | 1.0000 | 1.19<br>(0.95, 1.49) | 0.1359  | 1.0000 | 0.90<br>(0.68, 1.18) | 0.4327  | 1.0000 | 0.3466                | 0.1263                           |
| rs10832027 | A > G  | 0.32 | ARNTL | intron     | 0.96<br>(0.82, 1.11) | 0.5655  | 1.0000 | 1.07<br>(0.84, 1.35) | 0.5951  | 1.0000 | 0.98<br>(0.75, 1.29) | 0.8986  | 1.0000 | 0.8793                | 0.6516                           |
| rs1562438  | G > A  | 0.28 | ARNTL | intron     | 1.06<br>(0.91, 1.24) | 0.4624  | 1.0000 | 1.15<br>(0.90, 1.46) | 0.2713  | 1.0000 | 1.12<br>(0.85, 1.49) | 0.4209  | 1.0000 | 0.5456                | 0.9187                           |
| rs12421530 | C > G  | 0.39 | ARNTL | intron     | 0.98<br>(0.85, 1.13) | 0.7673  | 1.0000 | 1.10<br>(0.88, 1.38) | 0.4003  | 1.0000 | 0.85<br>(0.64, 1.12) | 0.2356  | 1.0000 | 0.7098                | 0.1493                           |
| rs3789327  | A > G  | 0.46 | ARNTL | intron     | 0.99<br>(0.86, 1.14) | 0.8563  | 1.0000 | 1.02<br>(0.82, 1.27) | 0.8785  | 1.0000 | 0.87<br>(0.67, 1.12) | 0.2698  | 1.0000 | 0.9830                | 0.3401                           |
| rs11022778 | A > C  | 0.32 | ARNTL | intron     | 1.04<br>(0.89, 1.21) | 0.6264  | 1.0000 | 0.88<br>(0.70, 1.11) | 0.2908  | 1.0000 | 1.07<br>(0.82, 1.40) | 0.6293  | 1.0000 | 0.6015                | 0.3194                           |
| rs969485   | A > G  | 0.30 | ARNTL | intron     | 1.16<br>(0.99, 1.35) | 0.0590  | 0.9944 | 1.19<br>(0.94, 1.51) | 0.1532  | 1.0000 | 1.19<br>(0.90, 1.57) | 0.2280  | 1.0000 | 0.3560                | 0.9400                           |
| rs1044432  | A > T  | 0.16 | ARNTL | downstream | 0.84<br>(0.69, 1.01) | 0.0643  | 1.0000 | 0.85<br>(0.64, 1.14) | 0.2859  | 1.0000 | 0.88<br>(0.62, 1.25) | 0.4878  | 1.0000 | 0.5643                | 0.8736                           |
| rs17452383 | A > G  | 0.13 | ARNTL | downstream | 1.07<br>(0.87, 1.30) | 0.5336  | 1.0000 | 1.01<br>(0.74, 1.37) | 0.9548  | 1.0000 | 1.13<br>(0.78, 1.63) | 0.5330  | 1.0000 | 0.9960                | 0.6959                           |
| rs10832032 | C > A  | 0.44 | ARNTL | downstream | 1.01<br>(0.87, 1.16) | 0.9347  | 1.0000 | 1.00<br>(0.80, 1.24) | 0.9653  | 1.0000 | 1.06<br>(0.82, 1.37) | 0.6417  | 1.0000 | 0.9996                | 0.7339                           |
| rs211135   | C > A  | 0.44 | TPH1  | upstream   | 0.99<br>(0.86, 1.14) | 0.9103  | 1.0000 | 1.11<br>(0.89, 1.39) | 0.3349  | 1.0000 | 0.96<br>(0.75, 1.24) | 0.7727  | 1.0000 | 0.6542                | 0.3724                           |
| rs1800532  | C > A  | 0.38 | TPH1  | intron     | 1.04<br>(0.90, 1.19) | 0.6248  | 1.0000 | 0.85<br>(0.68, 1.07) | 0.1686  | 0.9988 | 1.13<br>(0.88, 1.46) | 0.3482  | 1.0000 | 0.4052                | 0.0999                           |
| rs11024449 | G > A  | 0.24 | TPH1  | intron     | 0.95<br>(0.81, 1.12) | 0.5624  | 1.0000 | 0.95<br>(0.74, 1.22) | 0.6647  | 1.0000 | 1.11<br>(0.83, 1.48) | 0.4893  | 1.0000 | 0.9035                | 0.4505                           |
| rs591556   | G > A  | 0.17 | TPH1  | intron     | 0.94<br>(0.78, 1.13) | 0.5206  | 1.0000 | 1.16<br>(0.88, 1.53) | 0.2897  | 1.0000 | 0.75<br>(0.53, 1.07) | 0.1098  | 0.9786 | 0.5813                | 0.0541                           |

| SNP        | Allele | MAF  | Gene        | Location          | Main Effect Analysis |         |        | <24mo Shift-work     |         |        | ≥24mo Shift-work     |         |        | Joint Test | Interac-<br>tion Term |
|------------|--------|------|-------------|-------------------|----------------------|---------|--------|----------------------|---------|--------|----------------------|---------|--------|------------|-----------------------|
|            |        |      |             |                   | OR (CI)              | P-value | P-perm | OR (CI)              | P-value | P-perm | OR (CI)              | P-value | P-perm | P-value    | P-value               |
| rs623580   | T > A  | 0.35 | TPH1        | flanking_5UT<br>R | 0.99<br>(0.86, 1.14) | 0.8870  | 1.0000 | 1.21<br>(0.97, 1.51) | 0.0992  | 1.0000 | 0.81<br>(0.62, 1.06) | 0.1210  | 0.9994 | 0.2612     | 0.0246                |
| rs1079785  | G > A  | 0.43 | TPH1        | flanking_5UT<br>R | 0.99<br>(0.86, 1.14) | 0.8763  | 1.0000 | 1.02<br>(0.81, 1.27) | 0.8905  | 1.0000 | 1.01<br>(0.78, 1.31) | 0.9468  | 1.0000 | 0.9937     | 0.9474                |
| rs6485646  | A > G  | 0.49 | CRY2        | flanking_5UT<br>R | 1.03<br>(0.90, 1.18) | 0.6808  | 1.0000 | 0.97<br>(0.78, 1.20) | 0.7785  | 1.0000 | 0.81<br>(0.63, 1.05) | 0.1048  | 1.0000 | 0.9658     | 0.1428                |
| rs1401417  | C > G  | 0.23 | CRY2        | intron            | 0.94<br>(0.80, 1.12) | 0.5121  | 1.0000 | 1.02<br>(0.79, 1.31) | 0.9061  | 1.0000 | 0.69<br>(0.50, 0.95) | 0.0249  | 0.4082 | 0.9961     | 0.0611                |
| rs11038699 | A > G  | 0.28 | CRY2        | intron            | 1.03<br>(0.88, 1.20) | 0.7425  | 1.0000 | 1.13<br>(0.89, 1.43) | 0.3252  | 1.0000 | 0.75<br>(0.56, 1.00) | 0.0532  | 0.9099 | 0.6355     | 0.0338                |
| rs10838527 | A > G  | 0.08 | CRY2        | 3UTR              | 0.89<br>(0.69, 1.15) | 0.3738  | 1.0000 | 1.06<br>(0.73, 1.56) | 0.7473  | 1.0000 | 0.74<br>(0.45, 1.19) | 0.2149  | 1.0000 | 0.9493     | 0.2409                |
| rs2292910  | C > A  | 0.34 | CRY2        | 3UTR              | 1.09<br>(0.94, 1.26) | 0.2751  | 1.0000 | 1.08<br>(0.86, 1.36) | 0.4953  | 1.0000 | 0.89<br>(0.68, 1.17) | 0.3959  | 1.0000 | 0.8142     | 0.2643                |
| rs3824872  | C > A  | 0.21 | CRY2        | flanking_3UT<br>R | 1.03<br>(0.87, 1.22) | 0.7158  | 1.0000 | 0.96<br>(0.74, 1.24) | 0.7292  | 1.0000 | 1.07<br>(0.79, 1.44) | 0.6671  | 1.0000 | 0.9456     | 0.6142                |
| rs7118472  | G > A  | 0.06 | TMEM<br>135 | flanking_3UT<br>R | 1.03<br>(0.78, 1.36) | 0.8322  | 1.0000 | 1.16<br>(0.75, 1.79) | 0.5055  | 1.0000 | 0.93<br>(0.55, 1.58) | 0.7992  | 1.0000 | 0.8147     | 0.5582                |
| rs11235185 | C > A  | 0.08 | TMEM<br>135 | flanking_3UT<br>R | 0.94<br>(0.74, 1.22) | 0.6579  | 1.0000 | 0.72<br>(0.47, 1.11) | 0.1415  | 1.0000 | 0.71<br>(0.43, 1.17) | 0.1781  | 1.0000 | 0.3583     | 0.9308                |
| rs10748185 | G > A  | 0.49 | TPH2        | intron            | 1.02<br>(0.88, 1.17) | 0.8009  | 1.0000 | 1.03<br>(0.83, 1.29) | 0.7763  | 1.0000 | 1.09<br>(0.84, 1.40) | 0.5201  | 1.0000 | 0.9562     | 0.7547                |
| rs11179000 | A > T  | 0.22 | TPH2        | intron            | 0.87<br>(0.73, 1.03) | 0.0932  | 1.0000 | 0.78<br>(0.60, 1.02) | 0.0738  | 0.9962 | 0.75<br>(0.55, 1.03) | 0.0744  | 1.0000 | 0.2037     | 0.7945                |
| rs17110477 | A > T  | 0.24 | TPH2        | intron            | 0.88<br>(0.74, 1.04) | 0.1218  | 1.0000 | 0.74<br>(0.57, 0.97) | 0.0320  | 0.9790 | 0.81<br>(0.60, 1.09) | 0.1653  | 1.0000 | 0.1086     | 0.7335                |
| rs1386492  | A > G  | 0.18 | TPH2        | intron            | 1.09<br>(0.91, 1.30) | 0.3678  | 1.0000 | 1.24<br>(0.93, 1.64) | 0.1439  | 1.0000 | 1.01<br>(0.75, 1.38) | 0.9321  | 1.0000 | 0.3463     | 0.3456                |
| rs4760750  | C > A  | 0.41 | TPH2        | intron            | 0.96<br>(0.84, 1.11) | 0.6210  | 1.0000 | 0.88<br>(0.70, 1.11) | 0.2712  | 1.0000 | 0.93<br>(0.71, 1.20) | 0.5671  | 1.0000 | 0.5528     | 0.7766                |

| SNP        | Allele | MAF  | Gene  | Location          | Main Effect Analysis |         |        | <24mo Shift-work     |         |        | ≥24mo Shift-work     |         |        | Joint Test | Interac-<br>tion Term |
|------------|--------|------|-------|-------------------|----------------------|---------|--------|----------------------|---------|--------|----------------------|---------|--------|------------|-----------------------|
|            |        |      |       |                   | OR (CI)              | P-value | P-perm | OR (CI)              | P-value | P-perm | OR (CI)              | P-value | P-perm | P-value    | P-value               |
| rs1352250  | G > A  | 0.43 | TPH2  | intron            | 0.97<br>(0.84, 1.11) | 0.6301  | 1.0000 | 0.89<br>(0.71, 1.12) | 0.3135  | 1.0000 | 0.93<br>(0.72, 1.21) | 0.5909  | 1.0000 | 0.5927     | 0.7900                |
| rs11179050 | A > G  | 0.40 | TPH2  | intron            | 0.96<br>(0.83, 1.10) | 0.5482  | 1.0000 | 0.83<br>(0.66, 1.04) | 0.1070  | 1.0000 | 1.12<br>(0.87, 1.43) | 0.3959  | 1.0000 | 0.2425     | 0.0766                |
| rs1487275  | A > C  | 0.29 | TPH2  | intron            | 1.01<br>(0.87, 1.18) | 0.8565  | 1.0000 | 0.97<br>(0.76, 1.25) | 0.8399  | 1.0000 | 1.04<br>(0.79, 1.37) | 0.7805  | 1.0000 | 0.9676     | 0.6826                |
| rs1386482  | C > A  | 0.37 | TPH2  | intron            | 1.01<br>(0.88, 1.17) | 0.8541  | 1.0000 | 0.92<br>(0.73, 1.16) | 0.4763  | 1.0000 | 1.10<br>(0.85, 1.42) | 0.4689  | 1.0000 | 0.7499     | 0.2873                |
| rs1872824  | G > A  | 0.36 | TPH2  | flanking_3UT<br>R | 1.08<br>(0.93, 1.24) | 0.3217  | 1.0000 | 1.03<br>(0.82, 1.29) | 0.8018  | 1.0000 | 1.03<br>(0.80, 1.32) | 0.8312  | 1.0000 | 0.9732     | 0.9789                |
| rs11113179 | G > A  | 0.08 | CRY1  | intron            | 0.94<br>(0.73, 1.21) | 0.6268  | 1.0000 | 0.92<br>(0.62, 1.36) | 0.6820  | 1.0000 | 0.71<br>(0.44, 1.15) | 0.1601  | 1.0000 | 0.9214     | 0.3922                |
| rs10746085 | A > G  | 0.38 | CRY1  | intron            | 1.00<br>(0.87, 1.16) | 0.9805  | 1.0000 | 0.93<br>(0.74, 1.16) | 0.5188  | 1.0000 | 1.04<br>(0.80, 1.34) | 0.7962  | 1.0000 | 0.8077     | 0.4785                |
| rs10778533 | C > A  | 0.18 | CRY1  | flanking_5UT<br>R | 1.03<br>(0.87, 1.23) | 0.7233  | 1.0000 | 1.01<br>(0.77, 1.33) | 0.9499  | 1.0000 | 1.00<br>(0.73, 1.38) | 0.9930  | 1.0000 | 0.9998     | 0.9384                |
| rs12315175 | A > G  | 0.23 | CRY1  | flanking_5UT<br>R | 1.06<br>(0.91, 1.25) | 0.4527  | 1.0000 | 1.04<br>(0.81, 1.33) | 0.7613  | 1.0000 | 1.17<br>(0.87, 1.57) | 0.3022  | 1.0000 | 0.9443     | 0.6045                |
| rs10778534 | A > G  | 0.36 | CRY1  | flanking_5UT<br>R | 1.05<br>(0.91, 1.21) | 0.5052  | 1.0000 | 1.07<br>(0.86, 1.33) | 0.5719  | 1.0000 | 0.99<br>(0.76, 1.29) | 0.9544  | 1.0000 | 0.8446     | 0.6575                |
| rs11113193 | G > A  | 0.19 | CRY1  | flanking_5UT<br>R | 0.92<br>(0.77, 1.10) | 0.3699  | 1.0000 | 0.99<br>(0.74, 1.31) | 0.9239  | 1.0000 | 0.97<br>(0.70, 1.34) | 0.8433  | 1.0000 | 0.9939     | 0.8890                |
| rs11074634 | G > A  | 0.26 | RBBP6 | flanking_3UT<br>R | 1.27<br>(1.09, 1.49) | 0.0025  | 0.4114 | 1.30<br>(1.01, 1.67) | 0.0387  | 0.9802 | 1.26<br>(0.94, 1.69) | 0.1154  | 1.0000 | 0.1102     | 0.8829                |
| rs1442849  | G > A  | 0.26 | PER1  | upstream          | 1.10<br>(0.94, 1.29) | 0.2423  | 1.0000 | 1.06<br>(0.83, 1.36) | 0.6513  | 1.0000 | 1.29<br>(0.97, 1.72) | 0.0792  | 1.0000 | 0.8751     | 0.3050                |
| rs3027279  | A > C  | 0.41 | PER1  | upstream          | 1.05<br>(0.91, 1.20) | 0.5295  | 1.0000 | 1.09<br>(0.88, 1.37) | 0.4268  | 1.0000 | 1.06<br>(0.83, 1.37) | 0.6352  | 1.0000 | 0.7015     | 0.8672                |
| rs9914077  | A > G  | 0.42 | PER1  | flanking_3UT<br>R | 1.11<br>(0.96, 1.28) | 0.1517  | 0.9998 | 1.22<br>(0.99, 1.51) | 0.0685  | 0.9994 | 0.93<br>(0.71, 1.21) | 0.5744  | 1.0000 | 0.2117     | 0.1396                |

| SNP        | Allele | MAF  | Gene   | Location          | Main Effect Analysis |         |        | <24mo Shift-work     |         |        | ≥24mo Shift-work     |         |        | Joint Test<br>P-value | Interac-<br>tion Term<br>P-value |
|------------|--------|------|--------|-------------------|----------------------|---------|--------|----------------------|---------|--------|----------------------|---------|--------|-----------------------|----------------------------------|
|            |        |      |        |                   | OR (CI)              | P-value | P-perm | OR (CI)              | P-value | P-perm | OR (CI)              | P-value | P-perm |                       |                                  |
| rs2253820  | G > A  | 0.16 | PER1   | coding            | 0.94<br>(0.78, 1.14) | 0.5455  | 1.0000 | 0.98<br>(0.73, 1.32) | 0.9035  | 1.0000 | 1.03<br>(0.73, 1.43) | 0.8865  | 1.0000 | 0.9907                | 0.8113                           |
| rs3027188  | G > C  | 0.14 | PER1   | intron            | 1.01<br>(0.83, 1.22) | 0.9620  | 1.0000 | 1.03<br>(0.77, 1.39) | 0.8456  | 1.0000 | 1.07<br>(0.76, 1.51) | 0.6976  | 1.0000 | 0.9793                | 0.8527                           |
| rs2278637  | A > C  | 0.33 | PER1   | downstream        | 0.90<br>(0.77, 1.04) | 0.1584  | 0.9749 | 0.91<br>(0.72, 1.15) | 0.4143  | 1.0000 | 0.80<br>(0.61, 1.06) | 0.1183  | 0.9922 | 0.7468                | 0.4478                           |
| rs7224199  | C > A  | 0.48 | SLC6A4 | flanking_3UT<br>R | 0.90<br>(0.78, 1.03) | 0.1257  | 1.0000 | 1.01<br>(0.81, 1.26) | 0.9368  | 1.0000 | 0.89<br>(0.70, 1.14) | 0.3569  | 1.0000 | 0.9948                | 0.4627                           |
| rs3813034  | A > C  | 0.47 | SLC6A4 | flanking_3UT<br>R | 0.91<br>(0.79, 1.05) | 0.1852  | 1.0000 | 0.98<br>(0.79, 1.22) | 0.8540  | 1.0000 | 0.95<br>(0.74, 1.21) | 0.6669  | 1.0000 | 0.9889                | 0.8409                           |
| rs140701   | G > A  | 0.43 | SLC6A4 | intron            | 0.93<br>(0.81, 1.07) | 0.3129  | 1.0000 | 0.98<br>(0.79, 1.23) | 0.8745  | 1.0000 | 0.97<br>(0.75, 1.24) | 0.7819  | 1.0000 | 0.9905                | 0.8946                           |
| rs8076005  | A > G  | 0.20 | SLC6A4 | intron            | 0.97<br>(0.82, 1.16) | 0.7612  | 1.0000 | 0.95<br>(0.73, 1.24) | 0.6888  | 1.0000 | 0.92<br>(0.67, 1.26) | 0.5978  | 1.0000 | 0.9096                | 0.9016                           |
| rs2066713  | G > A  | 0.36 | SLC6A4 | intron            | 1.09<br>(0.95, 1.26) | 0.2184  | 1.0000 | 1.04<br>(0.83, 1.30) | 0.7433  | 1.0000 | 1.14<br>(0.88, 1.47) | 0.3324  | 1.0000 | 0.9434                | 0.6198                           |
| rs7214991  | A > G  | 0.37 | SLC6A4 | downstream        | 0.98<br>(0.85, 1.13) | 0.7815  | 1.0000 | 0.88<br>(0.71, 1.10) | 0.2627  | 1.0000 | 1.04<br>(0.81, 1.34) | 0.7464  | 1.0000 | 0.5214                | 0.2901                           |
| rs7223304  | A > G  | 0.35 | AANAT  | upstream          | 1.05<br>(0.90, 1.21) | 0.5331  | 1.0000 | 0.97<br>(0.77, 1.22) | 0.8079  | 1.0000 | 1.28<br>(0.98, 1.66) | 0.0698  | 1.0000 | 0.9460                | 0.1299                           |
| rs11077821 | G > A  | 0.14 | AANAT  | upstream          | 1.06<br>(0.87, 1.29) | 0.5865  | 1.0000 | 1.01<br>(0.74, 1.37) | 0.9742  | 1.0000 | 1.26<br>(0.90, 1.77) | 0.1831  | 1.0000 | 0.9984                | 0.3532                           |

**Supplementary Table 2.** Analyses presented in Supplementary Table 1 are repeated in CGEMS data for 19 common variants identified in Supplementary Table 1 as having a p-value <0.05 in interaction or permutation analyses in NHSII. All women were post-menopausal at blood draw and followed for incident breast cancer. Analyses are adjusted for matching factors (Main effect analyses:  $n_{\text{cases}}=896$ ,  $n_{\text{controls}}=886$ ; Analyses involving shift-work:  $n_{\text{cases}}=882$ ,  $n_{\text{controls}}=863$ ).

| SNP        | Allele | MAF   | Chr | Coordinate | Gene  | Location | Main Effect Analysis |         | <24mo Shift-work  |         | ≥24mo Shift-work  |         | Joint Test | Interac<br>tion<br>Term |
|------------|--------|-------|-----|------------|-------|----------|----------------------|---------|-------------------|---------|-------------------|---------|------------|-------------------------|
|            |        |       |     |            |       |          | OR                   | P-value | OR                | P-value | OR                | P-value | P-value    | P-value                 |
| rs10165970 | G > A  | 0.151 | 2   | 100823421  | NPAS2 | intron   | 1.17 (0.98, 1.39)    | 0.0906  | 1.10 (0.87, 1.38) | 0.4316  | 1.33 (0.98, 1.79) | 0.0635  | 0.1552     | 0.3154                  |
| rs7605570  | G > A  | 0.393 | 2   | 100925336  | NPAS2 | intron   | 0.95 (0.83, 1.10)    | 0.5084  | 0.91 (0.76, 1.09) | 0.2887  | 1.05 (0.84, 1.31) | 0.6576  | 0.5499     | 0.3272                  |
| rs12712085 | G > A  | 0.433 | 2   | 100931583  | NPAS2 | intron   | 0.93 (0.81, 1.06)    | 0.2827  | 0.87 (0.73, 1.04) | 0.1277  | 1.05 (0.85, 1.31) | 0.6343  | 0.3107     | 0.2134                  |
| rs3820787  | G > A  | 0.34  | 2   | 100932666  | NPAS2 | intron   | 1.02 (0.89, 1.18)    | 0.7374  | 0.97 (0.81, 1.17) | 0.7785  | 1.19 (0.94, 1.50) | 0.1488  | 0.3574     | 0.2064                  |
| rs10191450 | G > A  | 0.36  | 2   | 100937167  | NPAS2 | intron   | 1.16 (1.01, 1.33)    | 0.0368  | 1.08 (0.90, 1.29) | 0.3977  | 1.24 (0.99, 1.56) | 0.0634  | 0.1149     | 0.3111                  |
| rs882272   | G > A  | 0.419 | 2   | 100942631  | NPAS2 | intron   | 1.15 (1.01, 1.32)    | 0.0354  | 1.15 (0.97, 1.37) | 0.1115  | 1.11 (0.89, 1.38) | 0.3622  | 0.1776     | 0.8444                  |
| rs7581886  | A > G  | 0.144 | 2   | 100947678  | NPAS2 | intron   | 1.09 (0.90, 1.32)    | 0.3830  | 1.00 (0.79, 1.27) | 0.9933  | 1.26 (0.91, 1.75) | 0.1603  | 0.3083     | 0.2310                  |
| rs4851392  | G > A  | 0.275 | 2   | 100948408  | NPAS2 | intron   | 1.09 (0.93, 1.26)    | 0.2815  | 1.02 (0.84, 1.25) | 0.8207  | 1.25 (0.97, 1.60) | 0.0826  | 0.2367     | 0.2404                  |
| rs2305160  | G > A  | 0.341 | 2   | 100957736  | NPAS2 | coding   | 1.01 (0.87, 1.16)    | 0.9184  | 0.99 (0.82, 1.19) | 0.9244  | 1.07 (0.84, 1.36) | 0.5731  | 0.8871     | 0.6732                  |
| rs6719533  | A > G  | 0.463 | 2   | 100965519  | NPAS2 | intron   | 1.09 (0.95, 1.25)    | 0.2019  | 1.02 (0.86, 1.21) | 0.8452  | 1.28 (1.01, 1.61) | 0.0375  | 0.1222     | 0.1347                  |
| rs11123857 | A > G  | 0.283 | 2   | 100970244  | NPAS2 | intron   | 1.01 (0.88, 1.18)    | 0.8485  | 1.05 (0.87, 1.26) | 0.6278  | 0.98 (0.76, 1.26) | 0.8577  | 0.8992     | 0.7205                  |
| rs4864984  | G > A  | 0.212 | 4   | 55935044   | CLOCK | upstream | 0.94 (0.80, 1.11)    | 0.4467  | 0.94 (0.76, 1.16) | 0.5723  | 0.88 (0.67, 1.15) | 0.3415  | 0.5504     | 0.7419                  |
| rs11943456 | A > G  | 0.456 | 4   | 55971091   | CLOCK | upstream | 1.04 (0.91, 1.19)    | 0.5653  | 1.02 (0.86, 1.21) | 0.7871  | 1.06 (0.85, 1.33) | 0.5913  | 0.8495     | 0.8040                  |
| rs12676857 | A > G  | 0.145 | 8   | 18310852   | NAT2  | 3'UTR    | 1.01 (0.83, 1.22)    | 0.9332  | 0.96 (0.75, 1.22) | 0.7236  | 1.07 (0.77, 1.47) | 0.6989  | 0.8006     | 0.5073                  |
| rs623580   | T > A  | 0.328 | 11  | 18020553   | TPH1  | 5'UTR    | 1.10 (0.95, 1.26)    | 0.1931  | 1.09 (0.92, 1.30) | 0.3301  | 1.06 (0.84, 1.35) | 0.6221  | 0.5921     | 0.8195                  |
| rs1401417  | C > G  | 0.226 | 11  | 45836686   | CRY2  | intron   | 1.06 (0.91, 1.25)    | 0.4512  | 1.17 (0.95, 1.44) | 0.1319  | 0.94 (0.72, 1.22) | 0.6264  | 0.2847     | 0.2006                  |
| rs11038699 | A > G  | 0.264 | 11  | 45853653   | CRY2  | intron   | 1.08 (0.93, 1.26)    | 0.3161  | 1.14 (0.94, 1.39) | 0.1833  | 1.02 (0.79, 1.31) | 0.9059  | 0.4083     | 0.4978                  |
| rs17110477 | A > T  | 0.249 | 12  | 70630130   | TPH2  | intron   | 1.06 (0.91, 1.24)    | 0.4537  | 0.94 (0.77, 1.15) | 0.5658  | 1.24 (0.96, 1.62) | 0.1046  | 0.1553     | 0.0700                  |
| rs11074634 | G > A  | 0.287 | 16  | 24516709   | RBBP6 | 3'UTR    | 0.89 (0.77, 1.03)    | 0.1297  | 1.03 (0.85, 1.25) | 0.7667  | 0.70 (0.55, 0.88) | 0.0025  | 0.0071     | 0.0080                  |
